# Supplementary material for: Syngas production by bi-reforming methane on an Ni–K-promoted catalyst using hydrotalcites and filamentous carbon as a support material
Source: Royal Society of Chemistry journal article supplement (doi:10.1039/d0ra03264f), 2020-01-01
Supplement: d0ra03264f1.pdf [file d0ra03264f1.pdf]

## Supporting Information

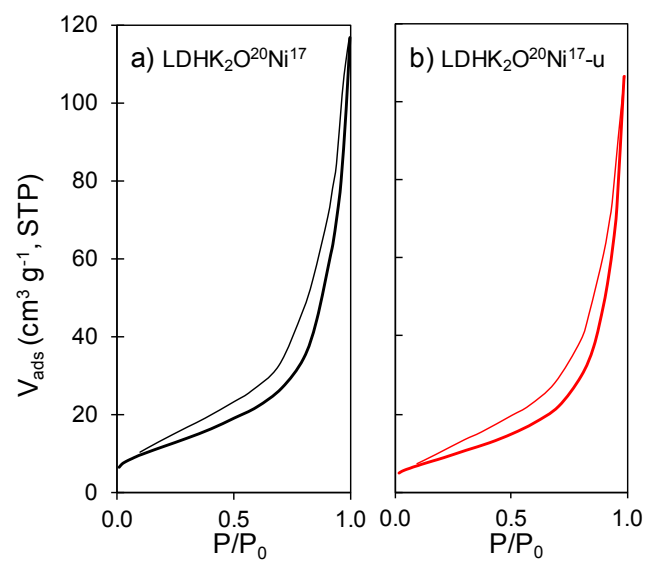

Figure S1:  $N_2$  adsorption-desorption isotherms of the catalysts before (a) and after used (b) in BRM. Colors have been used for better visibility.

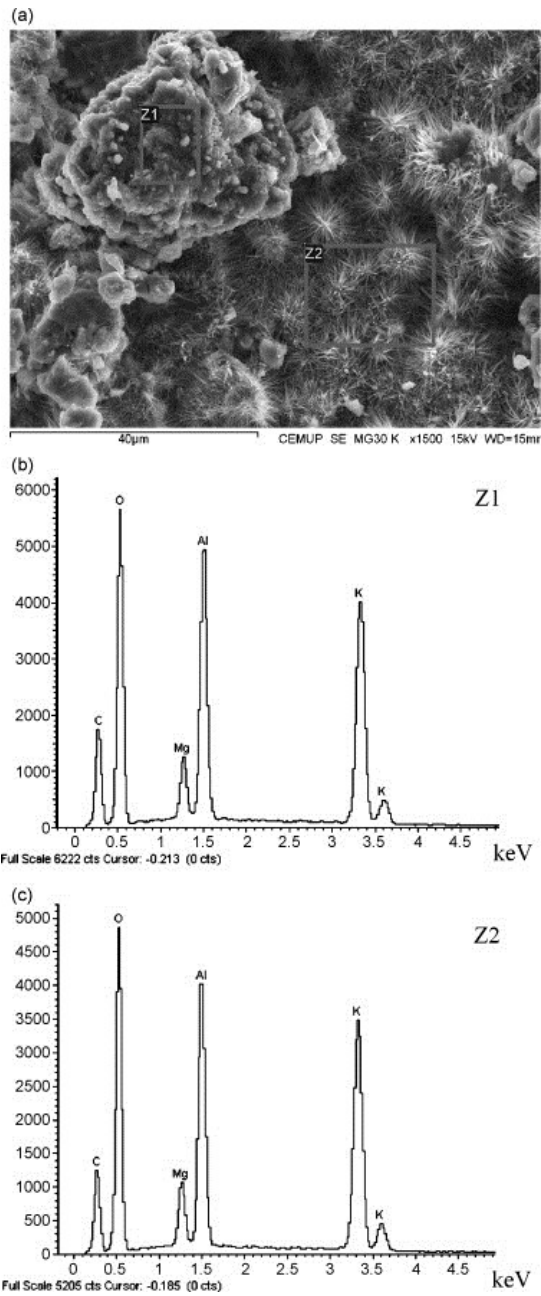

Figure S2: (a) SEM of MG30-K; EDX analysis of areas: (b) Z1 and (c) Z2. Adapted from <sup>29</sup>.

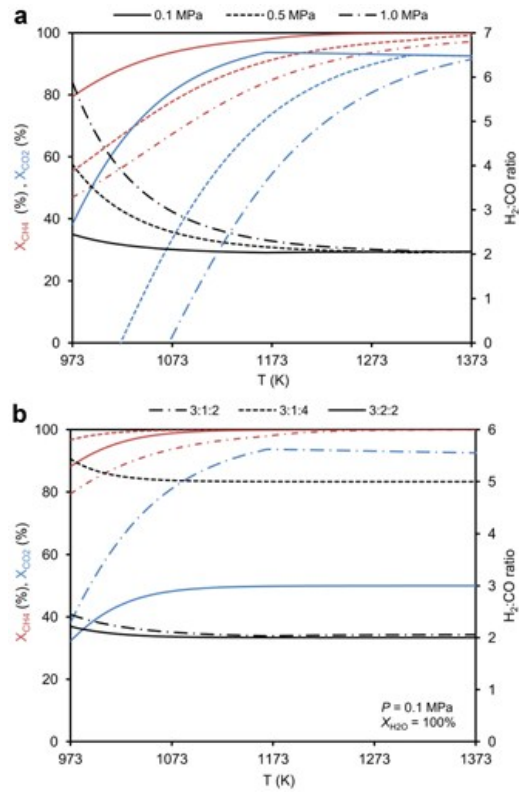

Figure S3: Conversion of CH<sub>4</sub> and CO<sub>2</sub>, and H<sub>2</sub> to CO ratio versus temperature: (a) effect of  $P$  and (b) effect of CH<sub>4</sub>:CO<sub>2</sub>:H<sub>2</sub>O ratios. Reproduced from <sup>9</sup>.

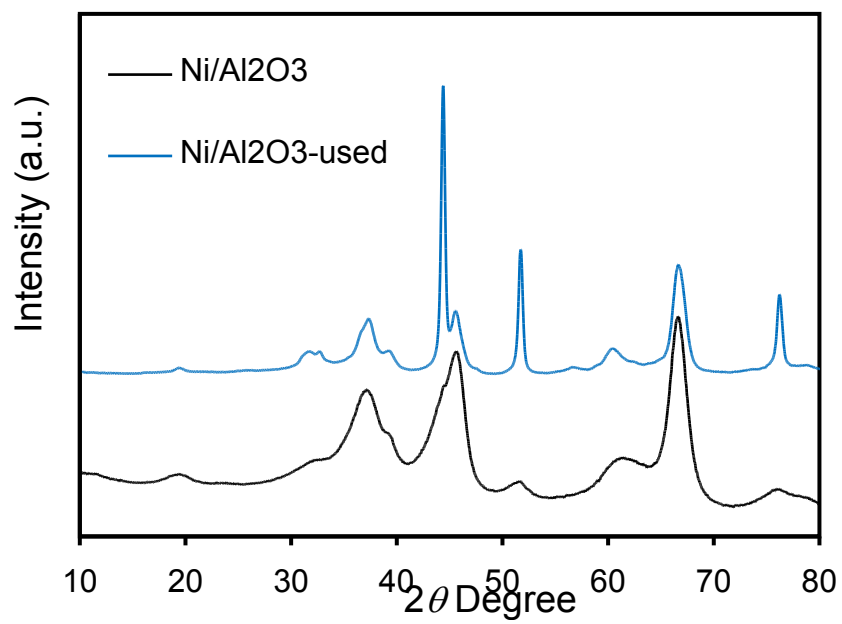

Figure S4: XRD patterns of catalyst used in a previous work <sup>10</sup>.

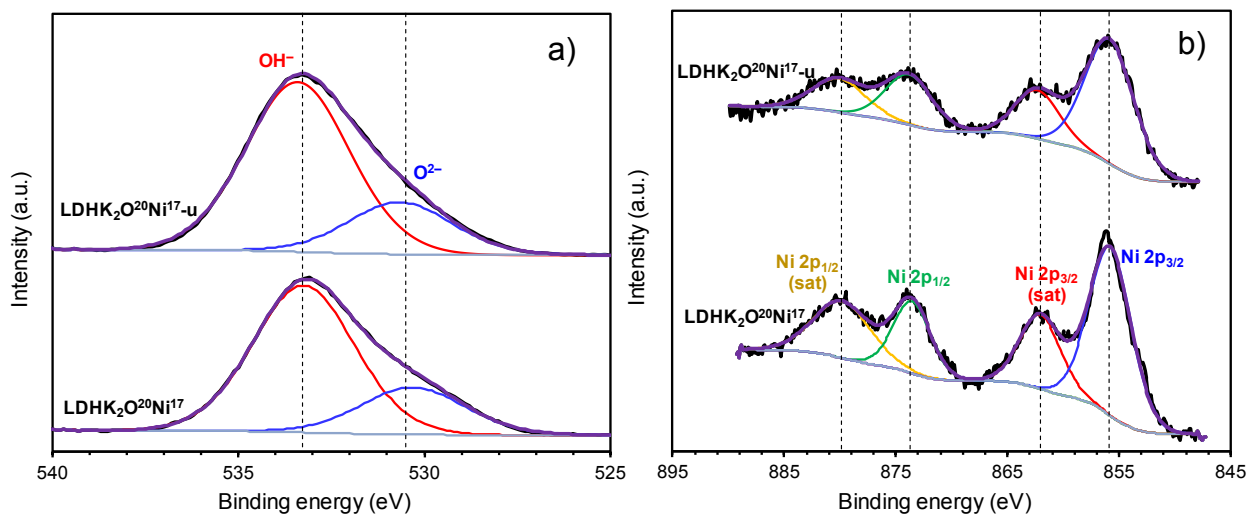

Figure S5: XPS spectra and deconvolution of the (a) O1s region and (b) Ni2p region of the different samples.

**Table S1:** Phases identified in the materials used before and after the BRM tests.

| Material                                              | Treatment              | Phase                                                                                   | 2θ positions and reflections                                                 | PDF-File ICDD |
|-------------------------------------------------------|------------------------|-----------------------------------------------------------------------------------------|------------------------------------------------------------------------------|---------------|
| LDH                                                   | -                      | Mg <sub>2</sub> Al <sub>2</sub> (OH) <sub>8</sub> CO <sub>3</sub> ·xH <sub>2</sub> O    | 12.4° (003), 29.8° (231), 34.9° (012), 38.8° (015), 60.9° (110)              | 43-0072       |
|                                                       |                        | AlO(OH)*                                                                                | 26.3° (010), 27.0° (110), 30.9° (101), 35.0° (200), 44.7° (210), 65.2° (002) | 48-0890       |
| LDHK <sub>2</sub> O <sup>20</sup>                     | H <sub>2</sub> reduced | KOH·H <sub>2</sub> O                                                                    | 22.1° (110), 30.5° (020), 33.3° (102), 45.8° (122)                           | 36-0791       |
|                                                       |                        | KOH                                                                                     | 32.2° (002), 32.4° (110), 65.2° (113)                                        | 21-0645       |
|                                                       |                        | Mg <sub>2</sub> Al <sub>2</sub> (OH) <sub>8</sub> CO <sub>3</sub> ·xH <sub>2</sub> O    | 12.4° (003), 29.8° (231), 34.9° (012), 38.8° (015), 60.9° (110)              | 43-0072       |
|                                                       |                        | AlO(OH)*                                                                                | 26.3° (010), 27.0° (110), 30.9° (101), 35.0° (200), 44.7° (210), 65.2° (002) | 48-0890       |
| LDHK <sub>2</sub> O <sup>20</sup> Ni <sup>17</sup>    | H <sub>2</sub> reduced | Ni                                                                                      | 44.5° (111), 52.0° (200), 76.4° (220)                                        | 70-1849       |
|                                                       |                        | NiO                                                                                     | 37.3° (111), 43.5° (200), 75.3° (311), 79.3° (222)                           | 73-1523       |
|                                                       |                        | Mg <sub>6</sub> Al <sub>2</sub> (CO <sub>3</sub> )(OH) <sub>16</sub> ·4H <sub>2</sub> O | 10.3° (006), 21.8° (018), 4.7° (024), 48.9° (211)                            | 41-1428       |
|                                                       |                        | AlO(OH)*                                                                                | 14.6° (010), 28.2° (110), 8.4° (101), 49.6° (210), 65.4° (002)               | 49-0133       |
| LDHK <sub>2</sub> O <sup>20</sup> Ni <sup>17</sup> -u | After BRM              | Ni                                                                                      | 44.5° (111), 52.0° (200), 76.4° (220)                                        | 70-1849       |
|                                                       |                        | NiO                                                                                     | 37.3° (111), 43.2° (200), 75.3° (311), 79.1° (222)                           | 73-1523       |
|                                                       |                        | AlO(OH)*                                                                                | 14.8° (010), 28.7° (110), 49.2° (210), 65.7° (002)                           | 49-0133       |
|                                                       |                        | MgAl <sub>2</sub> O <sub>4</sub>                                                        | 30.9° (220), 36.8° (311), 65.4° (440)                                        | 77-1193       |

\* Due to the high aluminum content, PURAL MG30 contains a significant amount of boehmite (*Product information*, Sasol Germany (formerly Condea), Hamburg 2012, <http://www.sasoltechdata.com/tds/PURAL-MG.pdf>)

Materials, characterization, and reaction studies.

The sorbent PURAL MG30 (aluminium magnesium hydroxide, 70% Al<sub>2</sub>O<sub>3</sub>) and PURAL MG30 K<sub>2</sub>CO<sub>3</sub> (aluminium magnesium hydroxide, 70% Al<sub>2</sub>O<sub>3</sub>; potassium carbonate, 20% K) was provided by CONDEA Chemie Germany (now SASOL).

The support material was impregnated with nickel(II) nitrate hexahydrate (VWR international – Merck group Germany).

Tubular stainless steel fixed-bed continuous down-flow reactor was an home-made equipment produced by Neves&neves Lda. Trofa in Portugal.

The heating furnace with a PID temperature controller is a product from Termolab-Fornos Electricos Lda, Águeda in Portugal.

An HPLC pump (Merck L-2130 (Hitachi, Tokyo, Japan) was used to introduce the liquid water inside the reactor.

The composition of the outgoing off-gas stream was determined with a gas chromatograph (GC 1000, Dani Chromatographs) equipped with an on-line multiport 16-valve system for sample injection (Valco Instruments Company Inc.), a capillary column (Carboxen 1010 Plot, Supelco) and a thermal conductivity detector.

The gases were furnished by Air Liquid Portugal with the following purities: methane N35 (99.95%), hydrogen N35 (99.95%), carbon dioxide N48 (99.998%), nitrogen N35 (99.95%), carbon monoxide N35 (99.95%) and helium ALPHAGAZ 2 (99.9998%).
